# Supplementary material for: Synthesis and Characterization of Hierarchical Zeolites Modified with Polysaccharides and Its Potential Role as a Platform for Drug Delivery
Source: MDPI journal article supplement (doi:10.3390/pharmaceutics15020535), 2023-02-05
Supplement: s1 [file s1]

# Supplementary Materials: Synthesis and Characterization of Hierarchical Zeolites Modified with Polysaccharides and Its Potential Role as a Platform for Drug Delivery

Agata Wawrzyńczak, Izabela Nowak, Natalia Woźniak, Jagoda Chudzińska, and Agnieszka Feliczak-Guzik

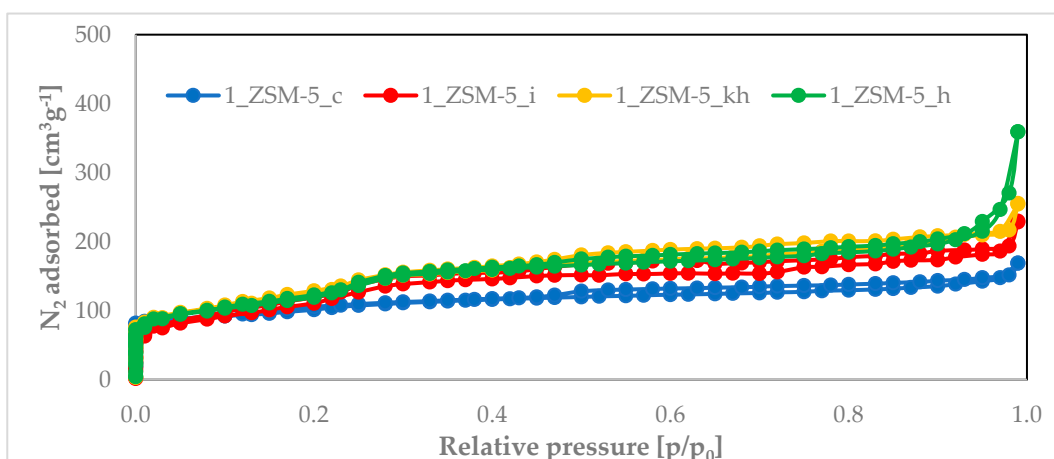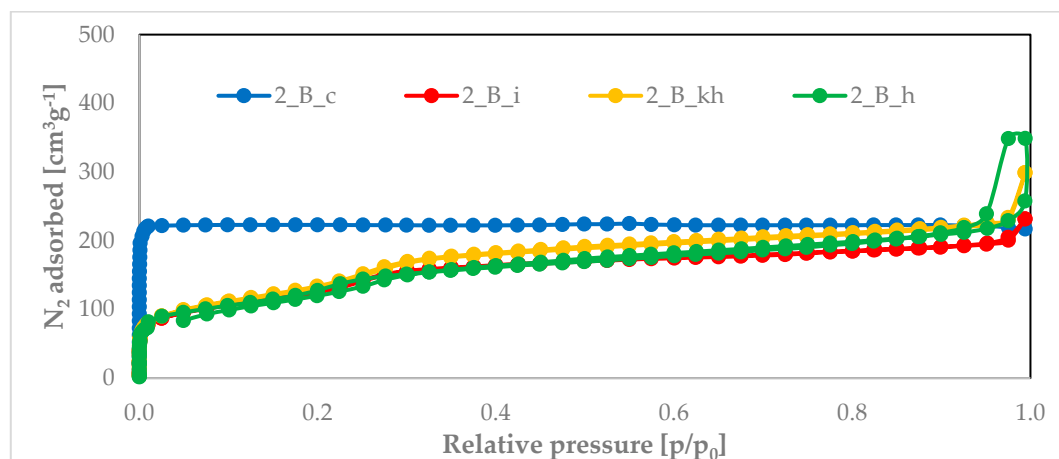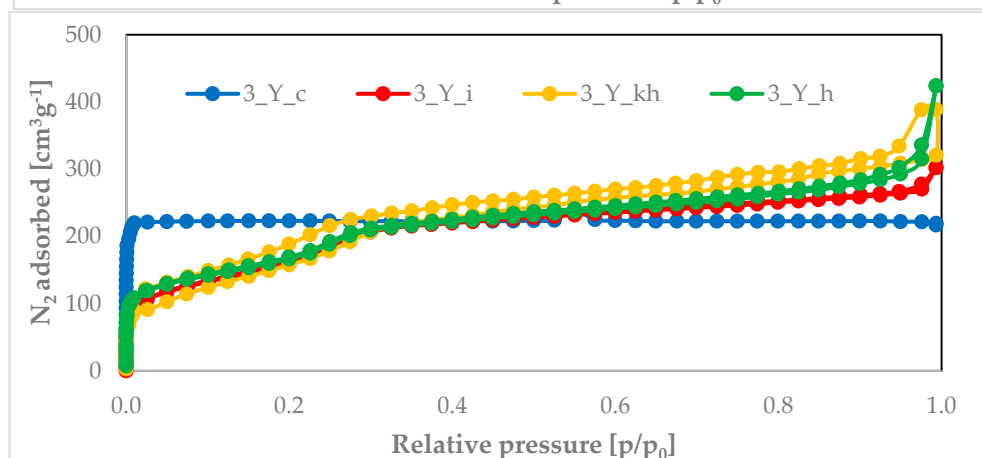

**Figure S1.** Nitrogen adsorption/desorption isotherms for materials: (A) based on commercial zeolite of ZSM-5 type (1\_ZSM-5\_c – commercial zeolite, 1\_ZSM-5\_i – inulin modified material, 1\_ZSM-5\_kh - hyaluronic acid modified material, 1\_ZSM-5\_h - heparin modified material); (B) based on commercial zeolite of BEA type (2\_B\_c –

commercial zeolite, 2\_B\_i – inulin modified material, 2\_B\_kh – hyaluronic acid modified material, 2\_B\_h – heparin modified material); (C) based on commercial zeolite of FAU type (3\_Y\_c – commercial zeolite, 3\_Y\_i – inulin modified material, 3\_Y\_kh – hyaluronic acid modified material, 3\_Y\_h – heparin modified material).

### MFI.

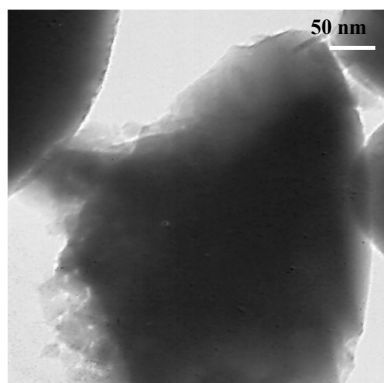

1\_ZSM-5\_i

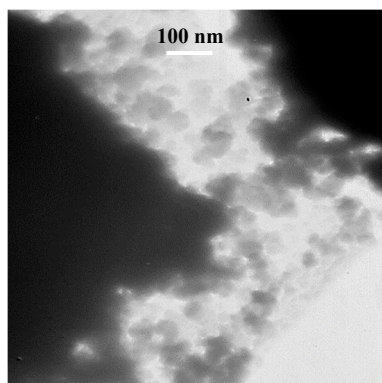

1\_ZSM-5\_kh

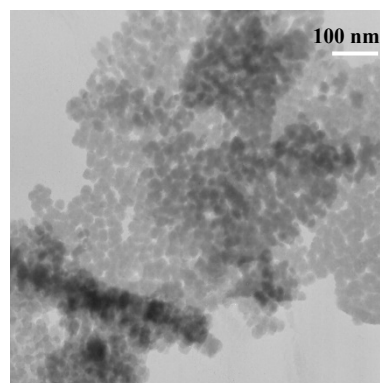

1\_ZSM-5\_h

### BEA

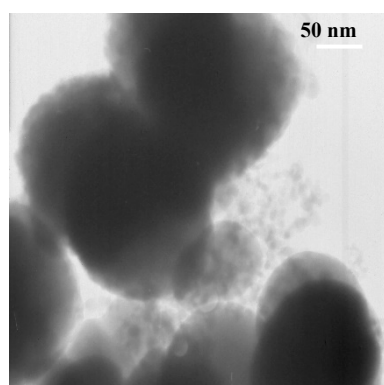

2\_B\_i

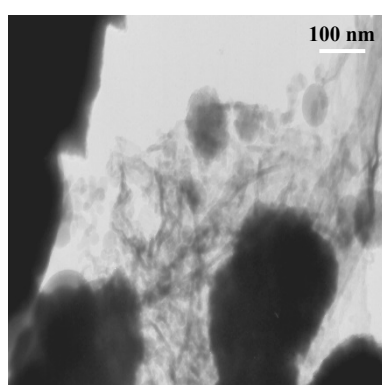

2\_B\_kh

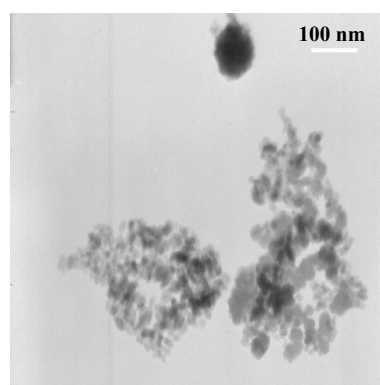

2\_B\_h

### FAU

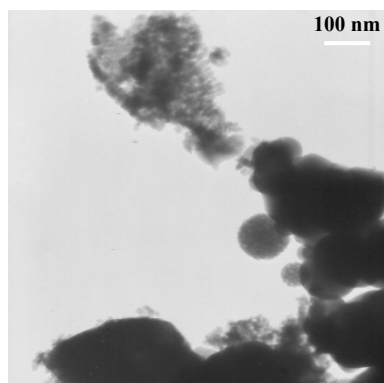

3\_Y\_i

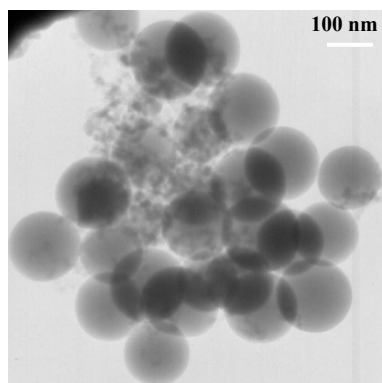

3\_Y\_kh

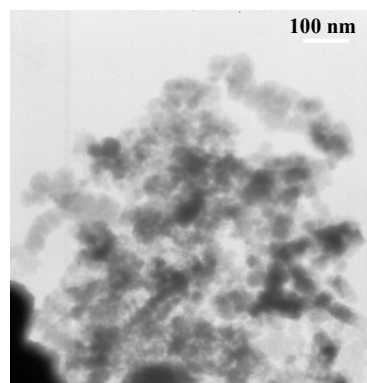

3\_Y\_h

**Figure S2.** Transmission electron microscopy (TEM) images of hierarchical zeolites modified with polysaccharides.
